# Supplementary material
Source: MDPI journal article supplement (https://www.mdpi.com/2073-4344/11/9/1128)
Supplement: s1 [file s1]

The Supporting Information

*for*

Enhanced Catalytic Soot Oxidation by  
Ce-based MOF-derived Ceria Nano-Bar  
with Promoted Oxygen Vacancy

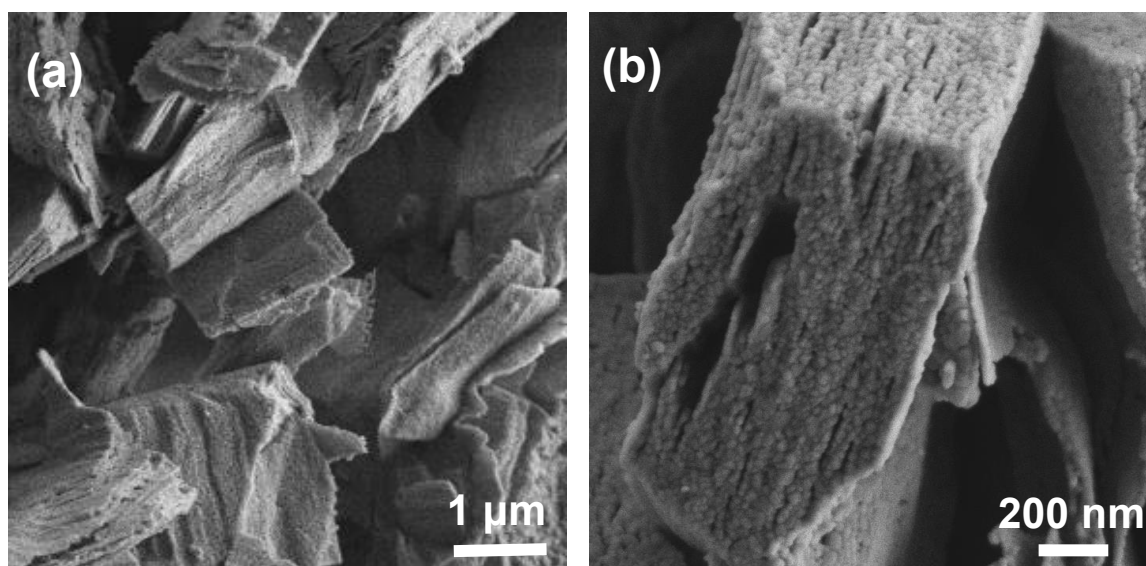

Figure. S1. (a), (b) SEM images of commercial  $\text{CeO}_2$  (comCeO).
